# Supplementary material
Source: PubMed Central journal article supplement (PMC2792711)
Supplement: NIHMS144835-supplement-1.pdf [file NIHMS144835-supplement-1.pdf]

## **Supplementary Material**

### **Supplemental Figure 1. Mutagenesis scheme for the $ey^{OK107/X}$ mutants**

Males of the Gal4 line OK107 were mutagenized *en masse* by EMS feeding, and crossed to  $ey^{D1Da}/ci^D$  females, generating males of the genotype  $OK107^*/ci^D$  (asterisk indicates mutagenized OK107 chromosome). These males were then crossed individually to  $ey^{D1Da}/ci^{lacZ}$  females, and their non- $ci^D$  progeny were screened for an *eyeless* phenotype. Of those found, their non- $ci^D$  siblings without *eyeless* phenotypes ( $OK107^*/ci^{lacZ}$ ) were crossed to  $ey^{D1Da}/ci^D$  females in order to establish stocks and confirm the observed *eyeless* phenotype.

### **Supplemental Figure 2. Eyeless protein expression is not affected in the $ey^{OK107/X}$ mutants**

Neither Eyeless protein synthesis nor stability is affected by the missense mutations in the  $ey^{OK107/X}$  mutants. Here Eyeless expression in the Kenyon cell cluster of the mushroom body is shown for each of the four  $ey^{OK107/X}$  alleles (homozygous for mutant allele) as well as a wildtype control (Oregon-R).
